# Supplementary material
Source: publisher figshare collection journal article supplement (https://diabetesjournals.figshare.com/articles/dataset/_/18624365)
Supplement: Supplementary file 1 [file 1]

## Sheet: Supplementary Table 1
Supplementary Table 1: Details of SNPs included in the study for calculating the fetal genetic and maternal genetic scores*
						GWAS of own birth weight						GWAS of offspring birth weight						Structural equation model (SEM)						EAF in South Asian cohorts
																		SEM-adjusted Fetal Effects			SEM-adjusted Maternal Effects
SNP	CHR	BP (hg19)	Nearest gene	EA	OA	EAF	Beta	SE	P-value	Sample size	Het P	EAF	Beta	SE	P-value	Sample size	Het P	Beta	SE	P-value	Beta	SE	P-value	PMNS	PS	MMNP	MBRC	GIFTS
rs17367504	1	11862778	MTHFR	G	A	0.160529	0.011543	0.003453	0.000833	298129	0.723154	0.166674	0.029878	0.004098	3.21e-13	210264	0.581032	-0.004678	0.005525	0.397179	0.031888	0.006183	2.51e-07	0.21068	0.208333	0.22103	0.192737	0.21902
rs12401656	1	43456767	FLJ32224/SLC2A1	G	A	0.864985	0.025183	0.003795	3.36e-11	292712	0.254668	0.862134	0.008687	0.004576	0.057667	197947	0.76843	0.02917	0.006073	1.56e-06	-0.005641	0.006955	0.417324	0.846936	0.818985	0.832842	0.832457	0.84751
rs80278614	1	119412317	TBX15	A	G	0.054405	0.040367	0.005872	6.45e-12	292074	0.675528	0.050537	0.014803	0.007341	0.043777	197948	0.004456	0.051555	0.009392	4.03e-08	-0.014008	0.011129	0.208138	0.0216359	0.0131885	0.0143981	0.00572277	0.01191
rs905938	1	154991389	DCST2/KCNN3	C	T	0.26178	0.026053	0.0029	2.77e-19	298135	0.149039	0.26846	0.018027	0.003426	1.46e-07	210262	0.346601	0.022872	0.004633	7.93e-07	0.005025	0.005216	0.335367	0.154603	0.161769	0.156652	0.168296	0.13298
rs670523	1	155878732	RIT1/LMNA	G	A	0.669239	0.018781	0.002741	7.58e-12	291451	0.074555	0.669429	0.008148	0.003225	0.011542	210262	0.477386	0.015571	0.00437	0.000366	0.004704	0.004914	0.338443	0.526217	0.485872	0.496781	0.480447	0.54474
rs72480273	1	161644871	FCGR2B/FCGR2C/HSPA6	C	A	0.182033	0.022546	0.00341	3.95e-11	291667	0.318741	0.188917	0.016275	0.004052	5.96e-05	197947	0.368161	0.022073	0.005421	4.7e-05	0.004592	0.006179	0.457371	0.0956835	0.114771	0.0996556	0.0895852	0.09331
rs10913200	1	176521655	PAPPA2	G	A	0.972127	0.051218	0.008047	2.02e-10	287089	0.200341	0.971319	0.047651	0.009394	4.01e-07	197948	0.903868	0.037921	0.012611	0.002638	0.029268	0.014323	0.041007	0.986619	0.98398	0.975322	0.982542	0.97848
rs61830764	1	212289976	DTL	A	G	0.376903	0.016623	0.002727	1.12e-09	291445	0.003863	0.374538	0.004312	0.003275	0.18791	197948	0.011575	0.018021	0.004319	3e-05	-0.003127	0.004978	0.529957	0.341576	0.346658	0.343	0.358565	0.32246
rs3806315	1	214724668	PTPN14	A	G	0.591142	0.017678	0.002653	2.78e-11	289070	0.439476	0.595906	0.012387	0.003193	0.000106	197948	0.425814	0.016427	0.004238	0.000106	0.005502	0.004865	0.258082	0.334447	0.324172	0.320422	0.304622	0.30714
rs708122	1	228216997	WNT3A	C	A	0.68105	0.016508	0.002765	2.45e-09	292718	0.542557	0.679995	0.013383	0.003266	4.22e-05	210264	0.144198	0.014998	0.004419	0.000688	0.003722	0.00497	0.453949	0.586408	0.570833	0.533262	0.532821	0.57244
rs10495563	2	9662210	ADAM17	A	G	0.664247	0.022148	0.002693	2.06e-16	298133	0.252967	0.668273	0.019368	0.003216	1.77e-09	210265	0.823428	0.015662	0.004313	0.000282	0.013025	0.004891	0.007744	0.391262	0.444792	0.418455	0.427374	0.43773
rs11893688	2	9695282	ADAM17	T	C	0.660752	0.02185	0.002731	1.29e-15	292716	0.452479	0.66603	0.019572	0.003212	1.13e-09	210263	0.825574	0.015203	0.004334	0.000452	0.013351	0.004887	0.006302	0.389459	0.445804	0.423916	0.428141	0.43797
rs2551347	2	23912401	KLHL29	T	C	0.749355	0.02446	0.002971	1.93e-16	292714	0.62114	0.746208	0.007716	0.003602	0.032201	197947	0.207678	0.028586	0.004778	2.2e-09	-0.006426	0.005483	0.24123	0.761	0.756526	0.765028	0.755032	0.78695
rs1179494	2	36809496	FEZ2	G	C	0.676334	0.010438	0.002752	0.00015	292716	0.290647	0.672316	0.019819	0.003234	9.11e-10	210204	0.297675	0.001844	0.004398	0.675004	0.017099	0.004931	0.000524	0.530853	0.515308	0.502353	0.508897	0.53121
rs754868	2	43185532	HAAO	G	A	0.41929	0.015871	0.002569	6.73e-10	298139	0.997835	0.420059	0.004889	0.003062	0.110355	210264	0.460485	0.018889	0.004127	4.72e-06	-0.003762	0.00467	0.420461	0.457282	0.429167	0.457082	0.483939	0.43717
rs4952673	2	43423870	ZFP36L2	A	G	0.474161	0.007471	0.002583	0.003833	292715	0.777561	0.47418	0.020476	0.003051	2.01e-11	210111	0.65845	-0.004017	0.004132	0.330907	0.024617	0.004656	1.24e-07	0.673786	0.675	0.679185	0.675279	0.66173
rs17034876	2	46484310	EPAS1	T	C	0.700357	0.042243	0.002925	3.11e-47	287749	0.043902	0.696083	0.030115	0.00342	1.36e-18	210261	0.783757	0.038851	0.004638	5.47e-17	0.01127	0.005195	0.030044	0.548359	0.554202	0.537989	0.538797	0.54071
rs4953353	2	46567276	EPAS1	G	T	0.631578	0.017903	0.0027	3.45e-11	292721	0.330369	0.628911	0.005441	0.003165	0.085575	210262	0.998341	0.019338	0.004287	6.45e-06	-0.003766	0.004824	0.434977	0.530155	0.502807	0.503283	0.493214	0.52376
rs560887	2	169763148	G6PC2	C	T	0.700273	-0.007649	0.00277	0.005776	298139	0.391644	0.700833	0.025535	0.003307	1.2e-14	210264	0.374083	-0.024657	0.004439	2.78e-08	0.037794	0.005025	5.43e-14	0.91068	0.897917	0.912017	0.878492	0.88797
rs2280235	2	191843830	STAT1	G	A	0.259091	0.018251	0.002957	6.9e-10	292718	0.979131	0.264933	0.012578	0.003477	0.0003	210215	0.212926	0.014399	0.004712	0.002245	0.005248	0.005285	0.32067	0.240196	0.230631	0.273819	0.230431	0.22995
rs10181515	2	227019461	LOC646736/COL4A4/IRS1	T	C	0.224502	0.021433	0.003048	2.13e-12	298138	0.742033	0.226348	0.006017	0.003643	0.098633	210265	0.821041	0.02136	0.004894	1.3e-05	-0.004666	0.005524	0.398372	0.13301	0.142708	0.1318	0.144269	0.1372
rs9855896	3	14287150	LSM3	G	A	0.21445	0.004173	0.003154	0.185794	286866	0.394582	0.221586	0.023247	0.003668	2.41e-10	210257	0.545565	-0.013769	0.005025	0.006138	0.033181	0.00557	2.57e-09	0.250701	0.240896	0.257134	0.243262	0.23895
rs2168443	3	46947087	PTH1R	T	A	0.379229	0.016595	0.00265	3.89e-10	292713	0.617434	0.380483	0.015845	0.003224	9.08e-07	197947	0.764599	0.010362	0.004261	0.015023	0.011493	0.004903	0.01908	0.395824	0.393248	0.377332	0.405416	0.41225
rs11708067	3	123065778	ADCY5	G	A	0.237762	0.040866	0.002989	1.59e-42	298128	0.029026	0.246113	0.001486	0.003537	0.674384	210168	0.252507	0.056135	0.004773	6.26e-32	-0.029494	0.005361	3.78e-08	0.202913	0.1875	0.187768	0.173184	0.18627
rs9851257	3	123125711	ADCY5	T	A	0.732892	0.020358	0.002901	2.36e-12	298130	0.249183	0.743524	0.029942	0.003586	7.18e-17	197947	0.323817	0.005276	0.004656	0.2572	0.02655	0.005439	1.05e-06	0.619492	0.64266	0.638576	0.635504	0.5853
rs6440006	3	141142691	ZBTB38	A	G	0.446148	0.010291	0.002594	7.32e-05	292713	0.170265	0.447723	0.021224	0.003061	4.27e-12	210249	0.670025	-0.000987	0.004149	0.812066	0.020365	0.004669	1.3e-05	0.267747	0.276	0.27897	0.277933	0.30092
rs2306700	3	142123841	XRN1	T	C	0.135735	0.022762	0.003782	1.81e-09	290416	0.644386	0.140596	0.015192	0.004414	0.000582	210265	0.393903	0.021504	0.005999	0.000338	0.005638	0.006657	0.397058	0.0733709	0.0690052	0.077456	0.0759916	0.10022
rs10935733	3	148622968	CPA3/AGTR1	T	C	0.399137	0.019369	0.002641	2.33e-13	292713	0.847638	0.390664	0.011915	0.003207	0.000205	197948	0.19607	0.02123	0.004225	5.04e-07	-0.001477	0.004879	0.762057	0.620359	0.595022	0.586628	0.592281	0.57288
rs4679760	3	155855418	KCNAB1	G	C	0.581335	0.009425	0.002617	0.000318	292718	0.259247	0.585732	0.033272	0.003188	1.83e-25	197948	0.918429	-0.008943	0.004202	0.033317	0.037796	0.004849	6.47e-15	0.381434	0.338596	0.359666	0.371171	0.38677
rs1482852	3	156798294	LOC339894/CCNL1	A	G	0.598612	0.050395	0.002618	1.58e-82	298130	0.006553	0.598589	0.022763	0.003103	2.3e-13	210264	0.0784	0.054284	0.004164	7.56e-39	-0.003393	0.004716	0.471812	0.49921	0.521837	0.451232	0.499878	0.48917
rs11711420	3	183349010	KLHL24	T	G	0.746655	0.018654	0.002964	3.22e-10	292710	0.983246	0.744537	0.006007	0.003595	0.094726	197947	0.254272	0.022362	0.004763	2.67e-06	-0.006217	0.005471	0.255863	0.832298	0.829222	0.824226	0.834258	0.81674
rs4144829	4	17903654	LCORL/DCAF16	C	T	0.267008	0.035507	0.002915	4.32e-34	292713	0.406754	0.261975	0.023307	0.003568	6.71e-11	197947	0.472873	0.031809	0.004685	1.12e-11	0.009623	0.005415	0.075531	0.150248	0.148417	0.123084	0.132606	0.16356
rs2174633	4	17917781	LCORL/DCAF16	A	C	0.26955	0.034707	0.002904	7.05e-33	292712	0.323591	0.267868	0.023908	0.00344	3.78e-12	210263	0.428922	0.030652	0.004631	3.62e-11	0.010786	0.005216	0.038643	0.146212	0.143881	0.122281	0.127652	0.16551
rs2189234	4	106075498	TET2	G	T	0.618432	0.01505	0.002639	1.21e-08	292719	0.387051	0.615762	0.025509	0.003116	2.86e-16	210262	0.217695	0.000503	0.004223	0.905168	0.025558	0.004748	7.31e-08	0.572027	0.552696	0.527358	0.53489	0.56961
rs6533183	4	106133184	TET2	C	T	0.352109	0.021786	0.002696	6.78e-16	292715	0.947121	0.34148	0.026631	0.003299	7.2e-16	197948	0.652684	0.008088	0.004334	0.062013	0.024475	0.00501	1.03e-06	0.547413	0.541321	0.531359	0.556422	0.58737
rs6845999	4	145565826	LOC646576/HHIP	T	C	0.431122	0.026255	0.002565	1.5e-24	298140	0.168316	0.428637	0.023096	0.003053	4.08e-14	210264	0.606748	0.017218	0.004111	2.8e-05	0.016564	0.004653	0.000371	0.536831	0.507259	0.478541	0.525838	0.4811
rs2131354	4	145599908	LOC646576/HHIP	A	G	0.527321	0.026184	0.002579	3.49e-24	292719	0.437836	0.526791	0.025738	0.003144	2.82e-16	197948	0.686142	0.015506	0.004149	0.000186	0.018917	0.004776	7.5e-05	0.557079	0.528145	0.493948	0.532367	0.4992
rs4579095	4	174726635	NBLA00301	G	A	0.401981	0.002661	0.002671	0.319097	288031	0.198401	0.406653	0.019033	0.003099	8.46e-10	210243	0.216799	-0.007134	0.004231	0.091777	0.022768	0.004727	1.46e-06	0.443178	0.459924	0.461614	0.413707	0.414
rs1818782	5	39424628	DAB2	C	A	0.636941	0.015568	0.002647	4.17e-09	313072	0.713773	0.649381	0.006157	0.003197	0.054141	217750	0.547321	0.015436	0.004366	0.000408	-0.00055	0.005045	0.913169	0.601424	0.626706	0.633171	0.616825	0.59001
rs351930	5	52003397	PELO	T	A	0.80114	0.019187	0.003228	2.85e-09	292714	0.673798	0.799784	0.007279	0.003807	0.055918	210254	0.085673	0.020245	0.005135	8.1e-05	-0.004987	0.005766	0.387101	0.713886	0.697343	0.704317	0.703161	0.68609
rs854037	5	57091783	ACTBL2	A	G	0.814161	0.026507	0.003297	9.41e-16	292718	0.031795	0.808978	0.018658	0.003887	1.61e-06	210228	0.174314	0.020094	0.005266	0.000136	0.010537	0.005886	0.073437	0.757126	0.793447	0.730423	0.782691	0.73934
rs28365970	5	67585723	PIK3R1	C	A	0.741475	0.019868	0.002948	1.65e-11	292712	0.682223	0.739825	0.016258	0.003581	5.71e-06	197947	0.789431	0.014902	0.004739	0.001662	0.009605	0.00545	0.078029	0.727174	0.706559	0.721193	0.718534	0.69148
rs6871635	5	133830395	PHF15	G	A	0.566187	0.015517	0.002614	3.02e-09	292716	0.554488	0.563166	0.025981	0.003078	3.31e-17	210234	0.568818	0.004966	0.004165	0.233166	0.021874	0.004692	3.13e-06	0.469982	0.475272	0.442299	0.464361	0.50229
rs1981627	5	133838180	PHF15	G	A	0.584748	0.017083	0.002629	8.36e-11	292716	0.599354	0.580568	0.025346	0.003092	2.57e-16	210238	0.376024	0.007484	0.004181	0.073474	0.020216	0.004707	1.7e-05	0.772325	0.764586	0.772608	0.785409	0.76713
rs2946179	5	157886627	EBF1	C	T	0.733706	0.019781	0.002912	1.14e-11	298129	0.900749	0.735384	0.045528	0.003556	1.76e-37	197948	0.638305	-0.003545	0.004645	0.445384	0.045487	0.0054	3.66e-17	0.631807	0.643382	0.640328	0.631564	0.66382
rs34471628	5	172196752	DUSP1	A	G	0.96178	0.017639	0.006791	0.009408	288465	0.435797	0.962457	0.058548	0.008049	3.65e-13	197948	0.577963	-0.014416	0.010832	0.183216	0.066879	0.012286	5.22e-08	0.992233	0.995944	0.993562	0.995112	0.98982
rs9379084	6	7231843	RREB1	G	A	0.882647	0.021801	0.004118	1.22e-07	298128	0.419512	0.883436	0.040696	0.004916	1.32e-16	208332	0.51924	0.003694	0.006487	0.569068	0.040481	0.007413	4.74e-08	0.892233	0.91875	0.893777	0.921089	0.89714
rs35261542	6	20675792	CDKAL1	C	A	0.733188	0.040621	0.002875	2.77e-45	298124	0.073669	0.737818	0.0053	0.00356	0.136539	197948	0.115592	0.049253	0.00465	3.23e-26	-0.018532	0.005406	0.000608	0.718135	0.748453	0.766094	0.740223	0.7095
rs9379832	6	26186200	HIST1H2BE/HIST1H2BH	A	G	0.729516	0.021965	0.002953	1.06e-13	291448	0.15582	0.745977	0.014623	0.00363	5.66e-05	197948	0.311308	0.01884	0.004711	6.4e-05	0.004333	0.005507	0.431325	0.521877	0.54932	0.512649	0.520778	0.51581
rs9366778	6	31269173	HLA-C	G	A	0.626619	0.018043	0.00271	2.86e-11	282578	0.74381	0.635361	0.010959	0.003144	0.000494	210260	0.640593	0.014379	0.00429	0.000802	0.004532	0.004788	0.343849	0.318447	0.326042	0.302576	0.389665	0.42046
rs6911024	6	31368451	MICA/HLA-C	T	C	0.901008	0.016906	0.004411	0.000128	277158	0.461086	0.90242	0.038308	0.005206	1.93e-13	210233	0.173419	-0.002462	0.006981	0.7243	0.0401	0.007734	2.16e-07	0.81165	0.806295	0.806454	0.827124	0.79214
rs9267812	6	32128394	PPT2	T	C	0.132705	0.022969	0.003873	3.11e-09	280156	0.130173	0.135386	0.021886	0.004576	1.76e-06	197947	0.484867	0.015456	0.006185	0.012456	0.013803	0.006979	0.047943	0.422523	0.409968	0.416236	0.433667	0.26547
rs1547669	6	33775641	MLN	G	A	0.497237	0.017808	0.002588	6.21e-12	289000	0.907755	0.499129	0.006902	0.00304	0.023188	208983	0.648028	0.018312	0.004131	9.28e-06	-0.002186	0.004637	0.637361	0.58835	0.552083	0.575107	0.543994	0.61417
rs75104038	6	34190104	HMGA1	A	G	0.059732	0.044913	0.00552	4.28e-16	289515	0.227848	0.061111	0.053755	0.00654	2.14e-16	197947	0.193046	0.024065	0.008751	0.005961	0.04115	0.009953	3.6e-05	0.036134	0.0525812	0.0472103	0.0363128	0.03276
rs75034466	6	34199815	HMGA1	T	C	0.045573	0.045953	0.006236	1.79e-13	289010	0.532086	0.047839	0.062484	0.007329	1.6e-17	197947	0.096662	0.02035	0.009914	0.04011	0.050743	0.011175	5.6e-06	0.0149786	0.0281031	0.0160944	0.0189057	0.01321
rs6911621	6	35529025	FKBP5/MAPK13/TEAD3	T	C	0.344483	0.01822	0.002703	1.64e-11	292722	0.748942	0.349063	0.026153	0.003183	2.2e-16	210264	0.522338	0.006407	0.004323	0.138298	0.022156	0.004851	4.94e-06	0.279035	0.27427	0.305912	0.263644	0.26073
rs9348981	6	35687249	FKBP5/MAPK13/TEAD3	T	G	0.71028	0.021002	0.00286	2.16e-13	292710	0.90511	0.708397	0.017779	0.003468	3e-07	197948	0.19846	0.015433	0.004579	0.000751	0.008654	0.005266	0.1003	0.796836	0.758624	0.776211	0.768539	0.7933
rs7744700	6	53349401	GCLC	T	A	0.710508	0.01985	0.002945	1.64e-11	291448	0.127653	0.703801	0.012156	0.003431	0.000399	209445	0.062347	0.017787	0.004611	0.000114	0.001065	0.005174	0.836931	0.603391	0.642744	0.641023	0.650971	0.6145
rs76094073	6	109288036	ARMC2/SESN1	G	C	0.121207	0.026513	0.003933	1.63e-11	292719	0.234995	0.120734	0.027423	0.004804	1.17e-08	197947	0.132014	0.011106	0.006346	0.080126	0.023412	0.007305	0.001351	0.210714	0.215699	0.210418	0.185161	0.19836
rs6568554	6	109290319	ARMC2/SESN1	A	C	0.144519	0.020878	0.003652	1.11e-08	292717	0.970816	0.143908	0.026865	0.004455	1.69e-09	197948	0.216359	0.006064	0.005892	0.303386	0.025461	0.006781	0.000174	0.245627	0.255258	0.241688	0.212356	0.23357
rs6925689	6	126865884	CENPW	T	C	0.494134	0.014966	0.002576	6.4e-09	292716	0.321964	0.493931	0.000585	0.003135	0.851823	197948	0.92818	0.017611	0.004143	2.1e-05	-0.007534	0.004769	0.114139	0.25504	0.311522	0.261705	0.304494	0.26696
rs6569647	6	130337266	L3MBTL3	T	C	0.801817	0.020035	0.003238	6.31e-10	292720	0.714759	0.796663	0.014298	0.003812	0.000178	210265	0.425513	0.014392	0.005173	0.005401	0.006123	0.005785	0.289929	0.776994	0.784922	0.783245	0.823182	0.76757
rs1415701	6	130345835	L3MBTL3	G	A	0.736336	0.017827	0.002939	1.35e-09	298129	0.137935	0.729476	0.021579	0.003489	6.43e-10	208908	0.307423	0.006814	0.004668	0.144335	0.018598	0.005273	0.00042	0.718778	0.729301	0.734979	0.756285	0.71161
rs6930558	6	141878920	NMBR	T	G	0.747004	0.021812	0.002996	3.44e-13	292714	0.744336	0.742584	0.012081	0.003508	0.000578	210263	0.812022	0.02209	0.004752	3.34e-06	0.000157	0.005333	0.976458	0.81697	0.813117	0.793523	0.830244	0.81711
rs962554	6	142734204	GPR126	T	C	0.715144	0.01681	0.00285	3.75e-09	292717	0.679471	0.711654	0.011693	0.003364	0.000513	210263	0.3789	0.015482	0.004557	0.000681	0.004431	0.005121	0.386879	0.659559	0.681335	0.670901	0.658726	0.67261
rs10872678	6	152039964	ESR1	T	C	0.723865	0.031699	0.002848	9.78e-29	298136	0.022103	0.721599	0.019936	0.003392	4.28e-09	210262	0.366044	0.02799	0.004558	8.23e-10	0.004463	0.005152	0.386296	0.845292	0.860902	0.837847	0.833304	0.84786
rs7772579	6	152042502	ESR1	A	C	0.720888	0.031402	0.002865	6.43e-28	292718	0.049346	0.718456	0.020981	0.003381	5.61e-10	210263	0.310454	0.026641	0.004577	5.84e-09	0.006372	0.005139	0.215004	0.845397	0.860879	0.837653	0.831994	0.84786
rs2934844	6	166142456	PDE10A	T	A	0.671634	0.020752	0.002816	1.8e-13	292253	0.363392	0.670978	0.010057	0.003368	0.002838	197947	0.871416	0.018178	0.004441	4.3e-05	0.000182	0.005116	0.971647	0.74056	0.745792	0.757332	0.759513	0.75396
rs1724889	7	2741021	AMZ1/GNA12	G	A	0.735391	0.015809	0.003004	1.45e-07	291447	0.206874	0.740268	0.022838	0.00362	2.9e-10	197947	0.397373	0.00632	0.004754	0.183713	0.016994	0.005501	0.002006	0.830042	0.842618	0.854318	0.871203	0.84082
rs4719648	7	2756832	AMZ1/GNA12	C	T	0.576729	0.019079	0.002606	2.57e-13	292711	0.750245	0.578452	0.016825	0.00317	1.14e-07	197948	0.317179	0.013676	0.004187	0.00109	0.009312	0.004822	0.053449	0.583187	0.596582	0.574388	0.60625	0.57376
rs59084784	7	22739562	IL6	A	C	0.323114	0.016559	0.002773	2.42e-09	292716	0.877776	0.323123	0.01674	0.003358	6.32e-07	197947	0.407509	0.011222	0.00444	0.011489	0.009155	0.005112	0.07329	0.62055	0.60976	0.602468	0.594964	0.45501
rs7808457	7	22798265	IL6	A	T	0.585564	0.010407	0.002618	7.1e-05	292719	0.168169	0.585729	0.018634	0.003081	1.51e-09	210254	0.16043	0.001588	0.004173	0.703493	0.016968	0.004696	0.000302	0.86085	0.862645	0.852145	0.855745	0.73524
rs34776209	7	23513093	IGF2BP3	C	T	0.755246	0.023223	0.002991	8.53e-15	292718	0.418773	0.752372	0.020983	0.003633	7.9e-09	197948	0.855854	0.015477	0.004812	0.001299	0.014315	0.005526	0.009578	0.684993	0.711184	0.673479	0.662693	0.7195
rs2908279	7	44174857	MYL7/GCK	T	G	0.495007	0.011005	0.00259	2.17e-05	292716	0.068014	0.494558	0.016001	0.003142	3.59e-07	197948	0.207973	0.006637	0.004151	0.10989	0.009814	0.004775	0.039863	0.532473	0.526608	0.519121	0.510581	0.53527
rs2971669	7	44231778	GCK	T	C	0.214166	0.010974	0.003108	0.000417	298134	0.842292	0.218715	0.027606	0.003694	8.18e-14	210172	0.269443	-0.00265	0.004961	0.593273	0.028105	0.005589	4.94e-07	0.238798	0.253562	0.234979	0.247905	0.22708
rs10265133	7	45895604	IGFBP1/IGFBP3	G	T	0.859349	0.000692	0.003891	0.858934	288682	0.41389	0.857555	0.027396	0.00458	2.27e-09	197947	0.842628	-0.020049	0.006079	0.000974	0.034242	0.006968	8.93e-07	0.948345	0.935987	0.952805	0.958642	0.92172
rs11983722	7	46298647	IGFBP3	A	T	0.937561	0.031888	0.005377	3.1e-09	290622	0.652605	0.931326	0.018931	0.006265	0.002523	210253	0.347024	0.028816	0.008501	0.000699	0.000122	0.009221	0.989484	0.831204	0.80838	0.805796	0.825008	0.80101
rs10265057	7	47275737	TNS3	G	A	0.091531	0.027313	0.004498	1.3e-09	292446	0.142887	0.097603	0.005412	0.00526	0.303537	210265	0.759948	0.0358	0.007099	4.58e-07	-0.013542	0.007828	0.083641	0.15169	0.209154	0.153837	0.194803	0.1242
rs2237467	7	50733316	GRB10	A	G	0.220803	0.018178	0.003112	5.34e-09	292710	0.761638	0.220883	0.014827	0.003694	6.04e-05	207377	0.2359	0.011416	0.00497	0.021609	0.012284	0.005622	0.028887	0.213849	0.238332	0.193892	0.255818	0.20526
rs112139215	7	73034559	MLXIPL	A	C	0.067572	0.047472	0.005142	2.81e-20	295398	0.143572	0.06875	0.01691	0.006208	0.006468	197947	0.635296	0.055757	0.008223	1.2e-11	-0.010328	0.009442	0.274043	0.00582524	0.00755833	0.00751717	0.0033338	0.00459
rs2282978	7	92264410	CDK6	C	T	0.325983	0.018251	0.002709	1.66e-11	298140	0.498456	0.325819	0.006886	0.003238	0.033469	210264	0.377487	0.020882	0.00435	1.58e-06	-0.002936	0.004931	0.551585	0.183495	0.184375	0.178112	0.201816	0.14596
rs45446698	7	99332948	CYP3A7-CYP3AP1	G	T	0.041364	0.024795	0.006602	0.000174	284207	0.481275	0.041811	0.066721	0.007832	1.69e-17	197948	0.08803	-0.016615	0.010473	0.112654	0.076813	0.011891	1.05e-10	0.00916602	0.00651771	0.0159163	0.0128541	0.0104
rs13231367	7	127509070	SND1	G	A	0.713561	0.016703	0.002843	4.36e-09	292714	0.33852	0.704766	0.019973	0.003325	1.95e-09	210264	0.577217	0.009003	0.004527	0.046755	0.017669	0.005062	0.000482	0.962935	0.963542	0.966421	0.967486	0.95573
rs6467157	7	127660763	SND1	T	C	0.712608	0.019506	0.002887	1.47e-11	292717	0.425993	0.702736	0.018865	0.003371	2.25e-08	210264	0.899417	0.01362	0.004585	0.002976	0.014435	0.005131	0.004903	0.95116	0.948209	0.958188	0.962374	0.9422
rs3918226	7	150690176	NOS3	C	T	0.91946	0.01487	0.004793	0.001929	296402	0.041483	0.918956	0.039755	0.005823	8.99e-12	197948	0.059408	-0.004869	0.007647	0.524355	0.039689	0.008853	7.36e-06	0.981164	0.987125	0.990716	0.992376	0.99089
rs62496903	8	6446938	MCPH1	T	C	0.08267	0.032797	0.004775	6.74e-12	290687	0.860505	0.084486	0.024601	0.005625	1.24e-05	197948	0.749953	0.027948	0.007504	0.000196	0.002737	0.008535	0.748453	0.0281495	0.0373896	0.0179925	0.024493	0.07398
rs732563	8	23345526	ENTPD4/NKX3-1	C	T	0.503933	0.017423	0.002572	1.29e-11	292723	0.288171	0.506093	0.006992	0.003025	0.020813	210265	0.563808	0.018559	0.004102	6.05e-06	-0.001813	0.004615	0.694362	0.635852	0.639169	0.637339	0.63757	0.63557
rs11778247	8	23403378	SLC25A37	G	A	0.834637	0.013643	0.003462	8.2e-05	291448	0.813148	0.834343	0.024878	0.004215	3.68e-09	197948	0.061759	0.00037	0.005574	0.947093	0.025645	0.006406	6.2e-05	0.845619	0.8424	0.844866	0.842508	0.8337
rs34036147	8	38366249	C8orf86/FGFR1	T	C	0.688337	0.018492	0.002845	8.37e-11	292711	0.238867	0.691743	0.008273	0.003419	0.015546	197948	0.887754	0.0194	0.004497	1.6e-05	-0.002195	0.005194	0.67255	0.429502	0.38247	0.410264	0.389015	0.39307
rs13266210	8	41533514	ANK1	A	G	0.786224	0.0268	0.003142	1.54e-17	292718	0.617239	0.783621	0.010963	0.003722	0.003241	210263	0.439128	0.029745	0.005017	3.05e-09	-0.005143	0.005634	0.3613	0.82483	0.861796	0.84935	0.844082	0.82412
rs72656010	8	57122215	PLAG1	T	C	0.868322	0.028319	0.003825	1.39e-13	292713	0.00637	0.868553	0.014322	0.004644	0.002051	197948	0.001514	0.026426	0.00613	1.6e-05	-0.00115	0.007059	0.87058	0.866395	0.864403	0.835938	0.846712	0.85904
rs6995390	8	77611012	ZFHX4	T	A	0.162936	0.006146	0.003494	0.078539	292714	0.206932	0.164741	0.029588	0.004132	8.36e-13	210050	0.796524	-0.014267	0.005556	0.010239	0.038963	0.006225	3.87e-10	0.275524	0.284277	0.315465	0.260635	0.30482
rs7819593	8	106115172	ZFPM2	C	T	0.242592	0.02178	0.003025	6.22e-13	292718	0.427054	0.238111	0.011535	0.003584	0.001295	210150	0.037147	0.02277	0.004801	2.1e-06	-0.001829	0.005426	0.736079	0.399029	0.439583	0.427019	0.433999	0.43703
rs13271368	8	126506140	TRIB1	C	T	0.761334	0.020223	0.003022	2.3e-11	296867	0.255516	0.761435	0.010538	0.003723	0.004655	197948	0.658996	0.020546	0.004879	2.5e-05	0.001966	0.005656	0.728188	0.728797	0.750258	0.737947	0.725267	0.711
rs13257363	8	142252580	SLC45A4	G	A	0.590719	0.01757	0.002618	2.01e-11	292711	0.277526	0.590286	0.011655	0.003188	0.000258	197948	0.671607	0.016911	0.004207	5.8e-05	0.002347	0.004841	0.627836	0.645481	0.687806	0.640019	0.641347	0.64913
rs9657468	8	142362391	GPR20	G	T	0.33423	0.014902	0.002774	7.93e-08	286868	0.721954	0.334179	0.003208	0.00333	0.335334	197947	0.522236	0.018308	0.004433	3.6e-05	-0.005257	0.005063	0.299164	0.381811	0.408121	0.385193	0.416899	0.41782
rs7854962	9	96900505	PTPDC1	C	G	0.784881	0.021679	0.003184	1.02e-11	292711	0.807705	0.785437	0.015094	0.003847	8.81e-05	197948	0.279626	0.015947	0.005073	0.001668	0.009993	0.00585	0.087603	0.635243	0.63194	0.667197	0.639576	0.67816
rs28457693	9	98217348	PTCH1/FANCC	G	A	0.109229	0.044196	0.004212	9.89e-26	288037	0.430568	0.106271	0.030104	0.0051	3.69e-09	197948	0.85065	0.040405	0.006708	1.7e-09	0.00945	0.007738	0.221983	0.079401	0.0620927	0.10234	0.0899735	0.10706
rs1411424	9	113892963	LPAR1	A	G	0.522865	0.019892	0.002587	1.54e-14	292717	0.212601	0.522509	0.023137	0.00304	2.87e-14	210255	0.835849	0.011875	0.004117	0.003921	0.015907	0.00464	0.000607	0.426214	0.43125	0.450644	0.430866	0.45397
rs2418135	9	113901309	LPAR1	A	G	0.522202	0.019918	0.00259	1.53e-14	292715	0.229095	0.519289	0.022794	0.00304	6.8e-14	210248	0.774751	0.012251	0.004115	0.00291	0.015385	0.004637	0.000908	0.447573	0.460417	0.48319	0.463281	0.4923
rs72760655	9	116916214	COL27A1	C	A	0.681143	0.00714	0.002778	0.010175	292710	0.477916	0.67813	0.026397	0.00336	4.12e-15	197947	0.397487	-0.008954	0.00445	0.044232	0.03143	0.005107	7.57e-10	0.551828	0.548657	0.516642	0.532652	0.55926
rs1323438	9	119115531	PAPPA	C	T	0.71832	0.018955	0.00289	5.58e-11	292712	0.567378	0.717053	0.007056	0.003405	0.038264	209854	0.751428	0.019969	0.004575	1.3e-05	-0.001392	0.005143	0.78663	0.703587	0.723301	0.702871	0.703739	0.70961
rs3933326	9	123633948	PHF19	G	A	0.676066	0.021331	0.002793	2.33e-14	292715	0.416004	0.676278	0.010064	0.003296	0.002273	210259	0.951538	0.023046	0.004445	2.16e-07	-0.00088	0.005009	0.860625	0.780177	0.773958	0.771459	0.777235	0.76823
rs10985827	9	125701608	RABGAP1/GPR21	G	T	0.140872	0.029972	0.003703	6.1e-16	292715	0.739187	0.139041	0.017133	0.004523	0.000153	197948	0.576536	0.027448	0.005961	4.13e-06	0.00352	0.006888	0.609362	0.196399	0.160691	0.21445	0.180362	0.23987
rs28505901	9	139241030	GPSM1	A	G	0.2485	0.024438	0.003085	2.46e-15	286903	0.96748	0.244954	0.016776	0.003653	4.44e-06	197947	0.346403	0.024416	0.004824	4.17e-07	0.001118	0.005533	0.839924	0.19795	0.19154	0.193325	0.187555	0.16814
rs4350272	10	25056118	ARHGAP21	A	G	0.269229	0.016999	0.002879	3.64e-09	298133	0.02098	0.271702	0.011287	0.003425	0.000988	210119	0.5644	0.017236	0.004596	0.000177	0.000748	0.005198	0.885521	0.135338	0.11528	0.136584	0.139154	0.1267
rs5030938	10	70975916	HKDC1/HK1	T	C	0.686392	0.02381	0.002783	1.23e-17	292718	0.918062	0.687037	0.020475	0.003282	4.56e-10	210264	0.320485	0.019153	0.004434	1.6e-05	0.010002	0.004997	0.04534	0.495091	0.470197	0.467967	0.511524	0.51045
rs9645500	10	70986723	HKDC1/HK1	G	T	0.694429	0.024297	0.002768	1.75e-18	298136	0.943098	0.693673	0.020024	0.003295	1.26e-09	210263	0.23695	0.01948	0.00442	1e-05	0.010173	0.005007	0.042186	0.49974	0.488393	0.483563	0.525064	0.52882
rs1112718	10	94479107	HHEX/IDE	G	A	0.404182	0.025684	0.00259	3.78e-23	298134	0.400298	0.406354	0.000707	0.003187	0.824412	197948	0.685649	0.035666	0.004183	1.51e-17	-0.018218	0.004844	0.00017	0.541746	0.56125	0.564033	0.556487	0.58734
rs10509669	10	95969913	PLCE1	A	T	0.746443	-0.00121	0.002984	0.685163	292711	0.98907	0.74458	0.025575	0.00352	3.88e-13	210110	0.843555	-0.019908	0.004734	2.6e-05	0.038666	0.005319	3.6e-13	0.683586	0.692928	0.72337	0.663487	0.694
rs3740360	10	96025491	PLCE1	C	A	0.109076	0.025733	0.004112	4.03e-10	292719	0.902061	0.11431	0.045529	0.004841	5.51e-21	210265	0.123747	0.002523	0.006543	0.699806	0.043757	0.007253	1.61e-09	0.0369553	0.0333333	0.0258541	0.0372528	0.06216
rs2274224	10	96039597	PLCE1	C	G	0.434492	0.021363	0.00257	9.78e-17	298132	0.375812	0.433117	0.01756	0.003063	1.01e-08	210042	0.633946	0.018561	0.004115	6.47e-06	0.007651	0.004665	0.100982	0.445631	0.40625	0.382986	0.457689	0.41088
rs10883846	10	104958244	NT5C2/CYP17A1	C	T	0.614715	0.016841	0.002618	1.3e-10	298138	0.183876	0.605828	0.012404	0.003205	0.00011	197948	0.520968	0.016096	0.00422	0.000136	0.003143	0.00487	0.518777	0.754958	0.731482	0.764696	0.767498	0.76413
rs7903146	10	114758349	TCF7L2	T	C	0.284902	0.011396	0.002817	5.27e-05	298140	0.003515	0.291228	0.021695	0.003345	9.08e-11	210264	0.361436	0.002691	0.004507	0.55045	0.019558	0.005085	0.00012	0.28932	0.304167	0.269313	0.277235	0.29509
rs7076938	10	115789375	ADRB1	T	C	0.735333	0.032051	0.002898	2.14e-28	298136	0.004819	0.731669	0.019898	0.003438	7.31e-09	210265	0.618091	0.029164	0.004627	2.91e-10	0.00687	0.005228	0.188836	0.754369	0.767708	0.727468	0.765363	0.74926
rs1801253	10	115805056	ADRB1	C	G	0.727332	0.030503	0.002915	1.38e-25	297700	0.117262	0.734184	0.021484	0.003457	5.28e-10	210262	0.935369	0.025742	0.004601	2.21e-08	0.010243	0.005245	0.050811	0.738377	0.759375	0.726395	0.232542	0.75188
rs71486610	10	124134803	PLEKHA1	C	G	0.476652	0.020349	0.00258	3.21e-15	292714	0.516766	0.470919	0.017187	0.003135	4.31e-08	197948	0.565558	0.01558	0.004143	0.00017	0.010736	0.00477	0.024394	0.54845	0.550562	0.557583	0.538943	0.54267
rs11042596	11	2118860	INS-IGF2	T	G	0.336254	0.026856	0.002777	4.33e-22	292715	0.943556	0.335359	0.005779	0.003355	0.08499	197948	0.113024	0.026645	0.004417	1.61e-09	-0.006655	0.005095	0.191465	0.535676	0.531783	0.56042	0.550043	0.51712
rs234864	11	2857297	KCNQ1	A	G	0.547439	0.015745	0.00261	1.66e-09	296865	0.83661	0.555651	0.004472	0.003181	0.159706	197947	0.604233	0.016879	0.004158	4.9e-05	-0.002344	0.004823	0.62694	0.544036	0.5416	0.552571	0.526946	0.57606
rs2168101	11	8255408	LMO1	C	A	0.689301	0.007384	0.002912	0.011258	292716	0.112265	0.691309	0.032655	0.003447	2.92e-21	206024	0.595287	-0.014949	0.004553	0.001025	0.038944	0.005186	5.91e-14	0.72456	0.758796	0.766094	0.755587	0.76962
rs4444073	11	10331664	ADM	A	C	0.520317	0.020182	0.002551	2.69e-15	298137	0.70849	0.514718	0.007982	0.003034	0.00853	210253	0.01636	0.022825	0.004079	2.2e-08	-0.005323	0.004618	0.249054	0.755351	0.727245	0.750325	0.774587	0.69158
rs12574749	11	32405355	WT1	C	A	0.722828	0.015219	0.002864	1.1e-07	292714	0.190401	0.719504	0.020571	0.00339	1.33e-09	209490	0.809594	0.004083	0.004584	0.373114	0.021775	0.005151	2.4e-05	0.576699	0.569792	0.576498	0.521608	0.54944
rs5030317	11	32410337	WT1	C	G	0.732755	0.017273	0.002902	2.71e-09	292715	0.339114	0.731066	0.02065	0.003427	1.73e-09	210230	0.921642	0.006855	0.004633	0.13896	0.020098	0.005207	0.000113	0.492733	0.506574	0.480742	0.441937	0.44862
rs10437653	11	46297631	CREB3L1	A	C	0.502557	0.009525	0.002514	0.000153	315261	0.052663	0.50026	0.017483	0.002958	3.51e-09	230068	0.2155	0.001643	0.004134	0.691127	0.018176	0.004658	9.5e-05	0.575728	0.534375	0.535408	0.569832	0.5886
rs10734564	11	48160429	PTPRJ	A	G	0.180942	0.005433	0.00336	0.105823	292717	0.408623	0.17922	0.027112	0.004103	4.01e-11	197948	0.089743	-0.009225	0.005397	0.087379	0.032974	0.006228	1.2e-07	0.141117	0.154108	0.14293	0.139744	0.15717
rs667515	11	69449076	CCND1	G	C	0.617803	0.01845	0.002704	9.32e-12	292266	0.286946	0.612851	0.015747	0.003166	6.69e-07	209612	0.215104	0.013431	0.004232	0.001507	0.01059	0.00476	0.02611	0.747567	0.745631	0.768103	0.744828	0.7321
rs61885091	11	69791952	ANO1/FGF4	A	G	0.168762	0.022879	0.003672	4.77e-10	277677	0.71795	0.170759	0.018067	0.00422	1.88e-05	197948	0.062038	0.0239	0.005672	2.5e-05	0.003849	0.006409	0.548057	0.119849	0.136992	0.172195	0.137529	0.13256
rs10830963*	11	92708710	MTNR1B	G	C	0.277226	0.019111	0.002868	2.79e-11	298126	0.045246	0.278766	0.044519	0.003417	9.06e-39	209954	0.146854	-0.001957	0.00455	0.667066	0.045899	0.005145	4.6e-19	0.43301	0.415625	0.405579	0.577514	0.40922
rs10895278	11	102095335	YAP1	C	T	0.337697	0.01089	0.002727	6.56e-05	292716	0.856363	0.340247	0.023117	0.003215	6.73e-13	210263	0.943842	-0.00149	0.004355	0.732259	0.025004	0.004899	3.33e-07	0.28241	0.271775	0.265958	0.25905	0.29421
rs11055030	12	12878349	APOLD1	G	C	0.71849	0.019952	0.002872	3.85e-12	292715	0.112757	0.71308	0.006468	0.003465	0.061981	197948	0.580432	0.022447	0.004588	9.98e-07	-0.004602	0.005258	0.381452	0.716872	0.686945	0.699466	0.711802	0.65081
rs2306547	12	26877885	ITPR2	C	T	0.534149	0.018719	0.002582	4.35e-13	292721	0.874125	0.530808	0.015992	0.00304	1.47e-07	210190	0.76212	0.015631	0.004118	0.000147	0.006685	0.004635	0.149191	0.804232	0.797018	0.810629	0.775227	0.75436
rs11051061	12	30914668	CAPRIN2	A	G	0.266367	0.011344	0.002923	0.000105	292716	0.197951	0.267955	0.026403	0.003464	2.59e-14	207299	0.626737	0.000524	0.004663	0.910503	0.025699	0.005265	1.05e-06	0.152	0.143648	0.152219	0.160447	0.17043
rs6582623	12	46613394	SLC38A1	C	T	0.869095	0.023591	0.003865	1.07e-09	292715	0.750486	0.861653	0.020638	0.004498	4.54e-06	209612	0.529541	0.020182	0.006075	0.000893	0.011074	0.006733	0.099999	0.869514	0.843015	0.845966	0.837822	0.86292
rs180438	12	47187260	SLC38A4	G	A	0.191649	0.011044	0.003276	0.000752	292716	0.116992	0.194904	0.036016	0.00385	8.85e-21	210265	0.946736	-0.007254	0.005213	0.164065	0.038509	0.005833	4.05e-11	0.452427	0.455208	0.439319	0.461853	0.45739
rs8756	12	66359752	HMGA2	C	A	0.486652	0.041429	0.002549	2.4e-59	298139	0.07715	0.486261	0.027582	0.003034	1.05e-19	210262	0.896811	0.036874	0.004083	1.71e-19	0.009058	0.004623	0.05006	0.187379	0.214583	0.186695	0.185754	0.19759
rs7968682	12	66371880	HMGA2	G	T	0.486291	0.041831	0.002557	4.24e-60	298092	0.083182	0.485956	0.027601	0.003047	1.41e-19	210265	0.962637	0.037494	0.00409	4.87e-20	0.008874	0.004632	0.055388	0.186408	0.2125	0.184549	0.189944	0.19647
rs1480470	12	66412130	HMGA2	G	A	0.631485	0.02433	0.002685	1.37e-19	292712	0.712114	0.62995	0.007446	0.00326	0.022376	197948	0.933522	0.027818	0.004309	1.07e-10	-0.007142	0.004956	0.149527	0.551624	0.540578	0.52585	0.532017	0.48145
rs1533688	12	102772745	IGF1	C	T	0.768775	0.005119	0.003022	0.090291	298133	0.38509	0.773789	0.022157	0.003745	3.39e-09	197948	0.325032	-0.003731	0.004883	0.444885	0.024575	0.005687	1.6e-05	0.80984	0.802241	0.795107	0.796875	0.80655
rs2647873	12	103081192	LINC00485/IGF1	A	G	0.519598	0.01806	0.002584	2.86e-12	292715	0.227927	0.518767	0.021588	0.003033	1.15e-12	209613	0.752584	0.008743	0.004109	0.033374	0.016618	0.004625	0.000327	0.402795	0.409223	0.445792	0.418578	0.44592
rs17033114	12	103123339	LINC00485/IGF1	T	C	0.940036	0.01571	0.005898	0.007746	289671	0.966852	0.933851	0.053973	0.006726	1.07e-15	210248	0.109708	-0.008021	0.008948	0.369997	0.052631	0.009725	6.24e-08	0.888139	0.902103	0.871941	0.882623	0.88406
rs3184504	12	111884608	SH2B3	C	T	0.520699	0.022966	0.002554	2.57e-19	296867	0.010517	0.517856	0.036552	0.003024	1.37e-33	210260	0.784221	0.005045	0.004081	0.216389	0.033935	0.00461	1.83e-13	0.914563	0.936458	0.934549	0.918994	0.86834
rs9549046	13	40647206	LINC00332	A	G	0.117596	0.029115	0.004062	7.97e-13	291448	0.584232	0.111271	0.013352	0.005007	0.007674	197947	0.522514	0.027457	0.006477	2.2e-05	0.001197	0.007582	0.874602	0.203594	0.197771	0.190938	0.175532	0.2542
rs34217484	13	48854550	LINC00441/RB1	A	T	0.26421	0.0192	0.00294	6.76e-11	287438	0.477052	0.264286	0.018393	0.003555	2.34e-07	197948	0.734437	0.011964	0.004728	0.011387	0.013468	0.005406	0.012727	0.335717	0.355576	0.342543	0.336122	0.31165
rs9318511	13	78601413	LINC00446	C	A	0.873248	0.026864	0.003902	5.98e-12	292266	0.057714	0.876297	0.014594	0.004749	0.002127	197947	0.641934	0.023641	0.006237	0.00015	0.006618	0.007221	0.359436	0.874846	0.896564	0.876609	0.902235	0.86647
rs6575803	14	101257755	MIR2392/DLK1	C	T	0.895496	0.031625	0.004454	1.29e-12	284076	0.31655	0.888889	0.00628	0.005142	0.221947	208906	0.000391	0.033789	0.006905	9.89e-07	-0.004787	0.007561	0.526648	0.966289	0.969244	0.969198	0.975802	0.95605
rs75844534	15	38667117	SPRED1	A	C	0.123521	0.02593	0.003941	4.9e-11	292715	0.649482	0.124476	-0.004107	0.004746	0.386762	197947	0.102291	0.035531	0.00628	1.54e-08	-0.02148	0.007214	0.002905	0.0578204	0.065399	0.0700204	0.0503443	0.06562
rs2928148	15	41401550	INO80	A	G	0.526131	0.006118	0.00258	0.017757	292719	0.645262	0.522771	0.018111	0.003038	2.57e-09	210263	0.089126	-0.004058	0.004115	0.324092	0.019973	0.004633	1.6e-05	0.463441	0.437829	0.452859	0.419888	0.50866
rs339969	15	60883281	RORA	A	C	0.619238	0.016841	0.002651	2.18e-10	292719	0.688668	0.614323	0.014711	0.003115	2.36e-06	210264	0.684071	0.010576	0.004224	0.012287	0.00994	0.004744	0.036155	0.592233	0.577083	0.591202	0.569832	0.61655
rs3784789	15	75082552	CSK	G	C	0.659401	-0.003873	0.002705	0.152143	298136	0.638489	0.674355	0.021671	0.003236	2.2e-11	210261	0.532406	-0.018175	0.004303	2.4e-05	0.029898	0.004912	1.15e-09	0.152224	0.144792	0.162834	0.164897	0.63118
rs12909648	15	86224570	KLHL25/AKAP13	G	A	0.524104	0.012314	0.002573	1.73e-06	292716	0.92587	0.522528	0.026471	0.003031	2.64e-18	210254	0.606694	-0.002714	0.004115	0.509576	0.027355	0.004628	3.41e-09	0.749539	0.751807	0.786452	0.749616	0.79898
rs12443252	15	91064690	CRTC3	T	C	0.547909	0.006214	0.002599	0.016831	292423	0.46878	0.549668	0.018479	0.003154	4.8e-09	197948	0.350005	-0.007464	0.004162	0.072961	0.022918	0.004791	1.72e-06	0.423884	0.396219	0.408906	0.388663	0.37489
rs7183988	15	91428589	FES/FURIN	G	T	0.528818	0.01824	0.002582	1.67e-12	294939	0.67619	0.52596	0.029236	0.003141	1.37e-20	197947	0.594484	0.006984	0.004136	0.091293	0.023778	0.004767	6.09e-07	0.584516	0.571743	0.562314	0.592357	0.60123
rs4932373	15	91429287	FES/FURIN	A	C	0.679564	0.020084	0.002752	3.04e-13	295749	0.851337	0.674641	0.028428	0.003337	1.69e-17	197948	0.847461	0.010189	0.004405	0.020733	0.019068	0.00507	0.000169	0.72285	0.719475	0.71642	0.709503	0.75092
rs55958435	15	96852638	NR2F2	A	G	0.74827	0.024732	0.002995	1.56e-16	292710	0.693242	0.750139	0.012592	0.003638	0.00054	197948	0.377546	0.021744	0.004791	5.66e-06	0.003694	0.005522	0.503582	0.802869	0.789249	0.755957	0.781223	0.74832
rs7402983	15	99193276	IGF1R	A	C	0.405097	0.024135	0.002685	2.63e-19	292717	0.985674	0.398141	0.015434	0.003244	2e-06	197948	0.04782	0.026562	0.004262	4.61e-10	-0.000338	0.004924	0.945341	0.413388	0.41685	0.426992	0.38738	0.42662
rs11630479	15	99240481	IGF1R	G	A	0.702773	0.013861	0.002818	8.85e-07	292721	0.23358	0.698389	0.016855	0.003306	3.48e-07	210262	0.097822	0.00658	0.004479	0.141769	0.013147	0.005023	0.008862	0.684005	0.671295	0.674345	0.69364	0.68653
rs2045457	16	20046115	GPR139/GPRC5B	G	A	0.311361	0.016194	0.002786	6.32e-09	292716	0.051266	0.306651	0.012887	0.003303	9.64e-05	210264	0.858699	0.012299	0.004444	0.005653	0.008306	0.005018	0.097864	0.454214	0.484835	0.485253	0.463055	0.45194
rs40434	16	55699525	SLC6A2	G	A	0.390748	0.016702	0.00265	3e-10	292714	0.797578	0.389943	0.002789	0.003218	0.386162	197948	0.725247	0.01725	0.004244	4.8e-05	-0.005623	0.004889	0.250079	0.39912	0.356026	0.37937	0.339378	0.40598
rs28544888	16	55741204	SLC6A2	C	T	0.911008	0.02579	0.004563	1.63e-08	292236	0.063814	0.912813	0.01511	0.005569	0.006682	197947	0.675253	0.026679	0.007292	0.000253	0.00197	0.008457	0.815785	0.879203	0.874357	0.863118	0.851917	0.8455
rs11641308	16	75312023	BCAR1	T	C	0.35039	0.00687	0.002752	0.012577	292710	0.552755	0.346035	0.020298	0.00333	1.12e-09	197948	0.05108	-0.005411	0.004378	0.216553	0.022572	0.005052	7.9e-06	0.486665	0.469449	0.555527	0.50361	0.47554
rs222857	17	7164563	CLDN7/SLC2A4	T	C	0.575405	0.026478	0.002579	1.06e-24	298132	0.130811	0.568158	0.018339	0.003062	2.16e-09	209557	0.904978	0.02552	0.004118	5.77e-10	0.004117	0.004662	0.377211	0.621359	0.607292	0.616512	0.653302	0.54795
rs2428362†	17	7180274	CLDN7/SLC2A4	T	C	0.575662	0.0254856	0.00261368	1.8e-22	292709	0.152052	0.571492	0.02084	0.00317	5.07e-11	197093	0.566401	0.022541	0.004185	7.19e-08	0.007604	0.00482	0.114638	0.612018	0.591384	0.597197	0.625366	0.51212
rs4511593	17	7455536	TNFSF12-TNFSF13	T	C	0.650443	0.017484	0.002707	1.09e-10	292717	0.846898	0.648985	0.006128	0.003185	0.054356	210267	0.262184	0.01934	0.004315	7.39e-06	-0.004305	0.004853	0.375043	0.672816	0.705208	0.656652	0.696229	0.70818
rs9909342	17	25652275	WSB1	A	G	0.381476	0.017867	0.002667	2.17e-11	292713	0.334336	0.383651	0.009359	0.003141	0.002892	209613	0.664124	0.019102	0.004242	6.71e-06	0.001028	0.004779	0.829636	0.516025	0.500455	0.49259	0.529719	0.48189
rs7223535	17	29211667	ATAD5	G	A	0.732042	0.02138	0.00291	2.12e-13	292715	0.984062	0.728423	0.01558	0.003518	9.62e-06	197948	0.433034	0.019718	0.004666	2.4e-05	0.006577	0.005351	0.218967	0.900962	0.914309	0.896999	0.884762	0.87753
rs11867479	17	68090207	KCNJ16	T	C	0.35339	0.017213	0.002664	1.08e-10	298138	0.199507	0.359935	0.00798	0.003165	0.011699	210262	0.89027	0.018077	0.004259	2.2e-05	-0.001538	0.004812	0.749219	0.219417	0.194792	0.238197	0.222067	0.25091
rs10221267	17	68464662	KCNJ2	T	C	0.511715	0.016717	0.002558	6.52e-11	296641	0.313865	0.514198	0.006607	0.003129	0.034738	197948	0.589366	0.017582	0.004111	1.9e-05	-0.001873	0.004752	0.693428	0.610477	0.639623	0.645987	0.679405	0.60972
rs73354194	17	79905947	MYADML2	C	T	0.025159	0.060799	0.008927	1.01e-11	268519	0.321433	0.023389	0.016347	0.010525	0.120398	197948	0.538239	0.059757	0.013898	1.7e-05	-0.010892	0.015991	0.495781	0.138902	0.152214	0.174996	0.155238	0.1436
rs9912553	17	79959703	ASPSCR1	G	C	0.725817	0.013925	0.00291	1.74e-06	288184	0.154519	0.724968	0.021129	0.003508	1.76e-09	197947	0.717658	0.005989	0.004661	0.198861	0.016535	0.005335	0.001939	0.624487	0.615333	0.664047	0.651554	0.60474
rs11082304	18	20720973	CABLES1	T	G	0.508292	0.015966	0.002554	4.22e-10	296792	0.034613	0.511962	0.009726	0.003035	0.001356	209553	0.187663	0.013421	0.004082	0.001009	0.003206	0.00462	0.487746	0.478641	0.432292	0.459227	0.458799	0.4465
rs2779165	19	4915447	UHRF1	G	C	0.184217	0.022108	0.003394	7.59e-11	291447	0.340344	0.189015	0.016755	0.003972	2.49e-05	208905	0.28307	0.017528	0.005326	0.000999	0.00705	0.00596	0.236839	0.0720223	0.0767781	0.0646985	0.0877053	0.12113
rs8106042	19	7161849	INSR	G	C	0.281475	0.020444	0.002909	2.17e-12	291451	0.691304	0.280398	0.00705	0.003485	0.043066	197947	0.291377	0.022884	0.004601	6.58e-07	-0.005639	0.005286	0.286121	0.256822	0.251041	0.260326	0.291913	0.26563
rs2967676	19	8789666	ACTL9	A	C	0.844833	0.02059	0.003604	1.14e-08	284486	0.197156	0.841635	0.043676	0.004191	2.15e-25	210262	0.747742	-0.003171	0.005732	0.58014	0.047807	0.006333	4.38e-14	0.919399	0.935402	0.922673	0.89536	0.89704
rs41355649	19	33790556	CEBPA	G	A	0.93397	0.034243	0.00531	1.17e-10	291155	0.911144	0.931942	0.018035	0.006237	0.003842	197948	0.489602	0.042069	0.008338	4.52e-07	-0.01042	0.009494	0.272411	0.973674	0.975295	0.985439	0.982351	0.95353
rs1129156	19	40719076	MAP3K10/AKT2	T	C	0.268449	0.017352	0.002909	2.53e-09	292719	0.188272	0.268362	0.007058	0.003429	0.039563	210262	0.770203	0.022116	0.004638	1.86e-06	-0.007186	0.005211	0.167946	0.210594	0.219128	0.188675	0.204048	0.221
rs147957154	19	43431040	PSG7	T	C	0.132424	0.023198	0.003898	2.75e-09	269001	0.722444	0.136839	0.000299	0.004493	0.946875	197947	0.645487	0.026075	0.006176	2.4e-05	-0.012228	0.006822	0.073045	0.12443	0.110553	0.0973584	0.118418	0.10736
rs516246	19	49206172	FUT2	C	T	0.50563	0.017505	0.002566	9.34e-12	295749	0.284952	0.494703	0.008326	0.003029	0.006001	210213	0.106827	0.016938	0.004083	3.4e-05	0.00045	0.004612	0.922328	0.778948	0.731589	0.738259	0.800143	0.72601
rs255773	19	54723546	LILRB3/RPS9	C	T	0.536208	0.018193	0.002687	1.32e-11	288702	0.944778	0.534118	0.011582	0.003185	0.000278	197948	0.439962	0.017761	0.004214	2.5e-05	0.0037	0.004833	0.443927	0.644707	0.60955	0.627058	0.645156	0.58453
rs147110934	19	55993436	ZNF628	G	T	0.975442	0.05233	0.008669	1.62e-09	276061	0.299357	0.97561	0.028049	0.010137	0.005675	197947	0.884271	0.05459	0.013666	6.5e-05	0.000587	0.015449	0.969687	0.994801	0.99375	0.991416	0.992985	0.99235
rs12461110	19	56320663	NLRP11	A	G	0.357994	0.005983	0.002716	0.02762	286534	0.799435	0.363647	0.020776	0.003164	5.32e-11	209560	0.385488	-0.004823	0.004317	0.263957	0.022393	0.00482	3.38e-06	0.315872	0.300865	0.291845	0.326816	0.29463
rs304001	19	56423668	NLRP13	G	A	0.394911	0.008861	0.002656	0.000852	287103	0.104519	0.394362	0.021718	0.003101	2.59e-12	210264	0.836874	-0.002601	0.004232	0.538824	0.022549	0.004729	1.86e-06	0.336522	0.327901	0.34942	0.37713	0.3597
rs6040076	20	10658882	JAG1	C	G	0.500114	0.019018	0.002623	4.35e-13	292711	0.407273	0.504257	0.015037	0.003163	2.03e-06	197948	0.905248	0.015217	0.004165	0.000259	0.008713	0.004801	0.06954	0.457211	0.445379	0.422103	0.464857	0.46798
rs6033062	20	11207419	LOC339593	A	T	0.460185	0.016156	0.002598	5.17e-10	292717	0.858897	0.460025	0.011137	0.003053	0.000266	210264	0.72414	0.013978	0.004129	0.000711	0.002913	0.004648	0.530885	0.362946	0.40811	0.368117	0.364544	0.39366
rs1203876	20	22540915	LINC00261/FOXA2	C	A	0.046164	0.038072	0.006218	9.44e-10	291539	0.842942	0.049546	-0.005316	0.007438	0.474812	210257	0.124474	0.05527	0.009715	1.28e-08	-0.040231	0.010651	0.000159	0.104854	0.0958333	0.114749	0.0998596	0.1153
rs11698914	20	31327144	COMMD7	C	G	0.233458	0.031861	0.003107	1.21e-24	292713	0.909743	0.229405	0.015343	0.003776	4.9e-05	197948	0.742301	0.029429	0.00495	2.75e-09	0.00323	0.005737	0.573388	0.295626	0.314753	0.308635	0.30901	0.32601
rs181451002	20	32466219	CHMP4B	G	A	0.978889	0.020074	0.009035	0.02631	300702	0.875179	0.978772	0.06287	0.010594	3.03e-09	217750	0.905233	-0.00644	0.014397	0.654665	0.058948	0.016359	0.000314	0.976185	0.978117	0.983906	0.972067	0.9852
rs2889874	20	33715777	EDEM2/MYH7B	G	T	0.451678	0.016076	0.002625	9.44e-10	292712	0.730829	0.453532	0.013452	0.00318	2.36e-05	197948	0.498712	0.013908	0.00419	0.000903	0.006863	0.004829	0.155305	0.506317	0.533581	0.516896	0.515089	0.52035
rs1012167	20	39159119	MAFB	C	T	0.400697	0.024145	0.002661	1.2e-19	292373	0.541096	0.407848	0.011349	0.003131	0.000291	210260	0.101166	0.023859	0.004242	1.86e-08	-0.002877	0.004769	0.546356	0.319387	0.299697	0.323844	0.292628	0.3402
rs753381	20	39797465	PLCG1	T	C	0.450563	0.01512	0.002557	3.43e-09	297797	0.03095	0.450659	0.003564	0.003041	0.241173	210262	0.221707	0.018192	0.004099	9.05e-06	-0.006536	0.004633	0.158365	0.398058	0.396875	0.398069	0.365922	0.39885
rs6026449	20	57272617	STX16-NPEPL1/GNAS	C	T	0.627232	0.016962	0.002679	2.49e-10	292375	0.387446	0.631852	0.004924	0.003244	0.129018	197948	0.482679	0.017794	0.004277	3.2e-05	-0.005669	0.004928	0.249955	0.51072	0.51538	0.50267	0.475719	0.49508
rs73143584	20	62445702	ZBTB46	A	G	0.110347	0.028776	0.004278	1.8e-11	286584	0.719391	0.113278	0.011229	0.005013	0.025097	197948	0.710804	0.031227	0.006712	3.28e-06	-0.006935	0.007624	0.363024	0.0254204	0.0275594	0.0206277	0.0237402	0.03269
rs2229742	21	16339172	NRIP1	G	C	0.88135	0.027215	0.004175	7.35e-11	297794	0.094544	0.891734	0.015788	0.004989	0.001562	210164	0.595515	0.027632	0.006332	1.3e-05	0.001811	0.007372	0.805962	0.933981	0.9375	0.945474	0.925524	0.93549
rs220193	21	43581308	UMODL1	A	G	0.225307	0.020584	0.003116	4.07e-11	292712	0.940134	0.213078	0.006785	0.003827	0.076265	197947	0.964605	0.017993	0.004967	0.000292	-0.000905	0.005801	0.876083	0.35334	0.414042	0.353178	0.378655	0.34953
rs134594	22	29468456	KREMEN1	C	T	0.350625	0.016799	0.002709	5.76e-10	290627	0.226763	0.352071	-0.001799	0.003192	0.573094	208643	0.097203	0.021565	0.004321	6.02e-07	-0.009385	0.004859	0.053458	0.427712	0.420971	0.38585	0.382594	0.4327
rs41311445	22	42070374	NHP2L1/SREBF2	A	C	0.903386	0.032564	0.004469	3.33e-13	289016	0.024107	0.90435	0.017275	0.005338	0.001218	197947	0.517174	0.034071	0.007042	1.31e-06	-0.002216	0.00809	0.784103	0.954136	0.975692	0.96444	0.956807	0.95923
rs7285579	22	46441980	LOC100271722	C	T	0.697743	0.017277	0.002901	2.66e-09	290177	0.229987	0.703041	0.009991	0.003454	0.003834	197947	0.91688	0.017618	0.004545	0.000106	-0.002048	0.005237	0.69575	0.787993	0.785562	0.76327	0.744019	0.81432
SNP-Single nucleotide polymorphism; CHR - chromosome; BP - base position; EA - effect allele; OA - other allele; EAF - effect allele frequency; Beta - effect size; SE - standard error; HetP - heterogeneity p-value
PMNS - Pune Maternal Nutrition Study, PS - Parthenon Study, MMNP - Mumbai Maternal Nutrition Project, MBRC - Mysore Birth Record Cohort, GIFTS includes Dhaka-WP2, Dhaka-WP3 and UK-Bang cohorts
*, Warrington et al, 2019
